# Supplementary material
Source: Springer Nature journal article supplement (https://www.springermedizin.de/resource/supplementary/12913_2011_2013_MOESM2_ESM.pdf/9530686)

**Figure 2 - Probabilistic analysis of the ICER: scatter of points and confidence ellipses for disease-free survival**

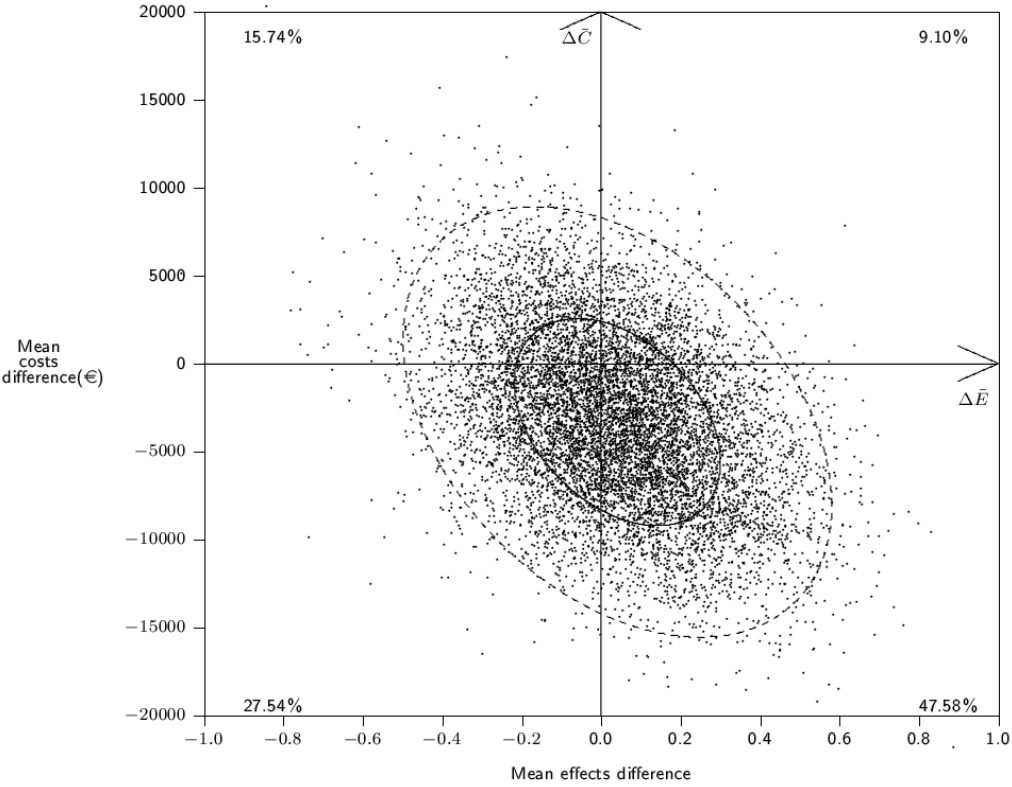

Supplement: MOESM2 [file 9530686]
